# Supplementary material for: Bio-based epoxy-anhydride thermosets from six-armed linoleic acid-derived epoxy resin
Source: Royal Society of Chemistry journal article supplement (doi:10.1039/c6ra09077j), 2016-01-01
Supplement: c6ra09077j1.pdf [file c6ra09077j1.pdf]

## **Bio-based Epoxy-Anhydride Thermosets from Six-Armed Linoleic**

### **Acid-Derived Epoxy Resin**

Ren Liu, <sup>a\*</sup> Xiaopeng Zhang, <sup>a</sup> Shuai Gao, <sup>b</sup> Xiaoya Liu, <sup>a</sup> Zhen Wang, <sup>c</sup> and Jingling Yan <sup>b\*</sup>

<sup>a</sup> The Key Laboratory of Food Colloids and Biotechnology, Ministry of Education, School of Chemical and Material Engineering, Jiangnan University, Wuxi 214122, P. R. China. E-mail: liuren@jiangnan.edu.cn;

<sup>b</sup> Laboratory of Polymer Composites Engineering, Changchun Institute of Applied Chemistry, Chinese Academy of Science, Changchun, 130022, P. R. China. E-mail: jyan@ciac.ac.cn;

<sup>c</sup> State Key Laboratory of Polymer Physics and Chemistry, Changchun Institute of Applied Chemistry, Chinese Academy of Sciences, Changchun 130022, P. R. China

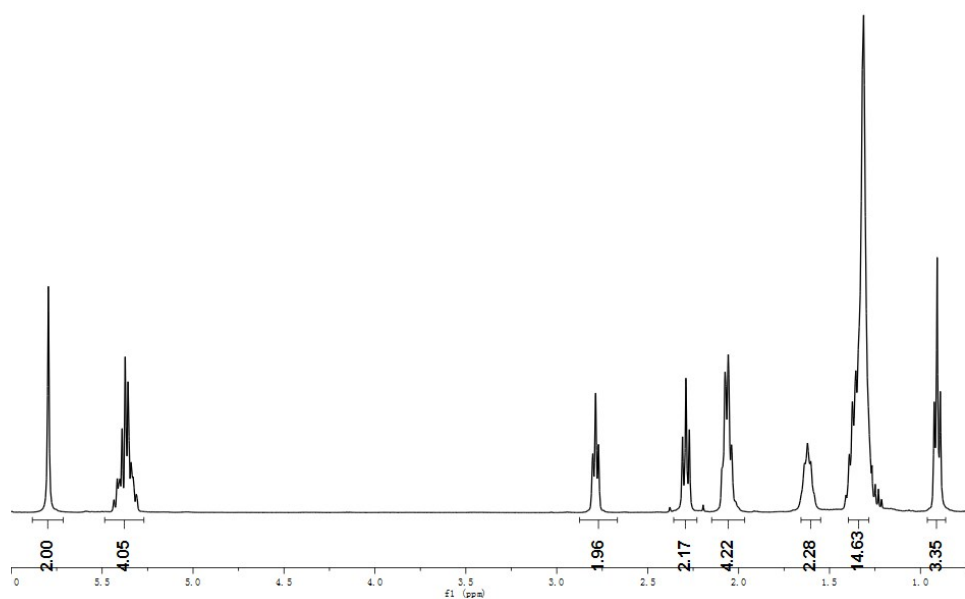

**A**

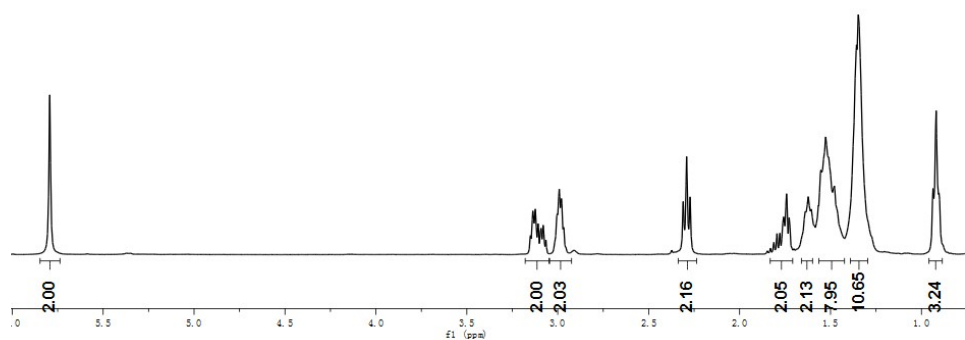

**B**

**Figure S1.**  $^1\text{H}$  NMR spectra with integrations for HL (A) and EHL (B)

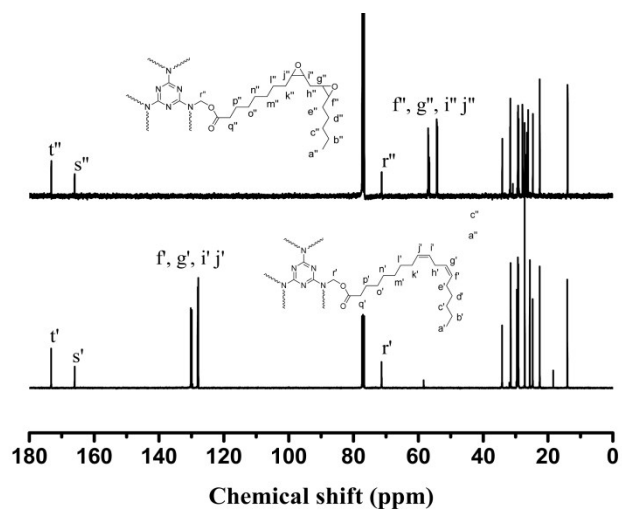

**Figure S2.**  $^{13}\text{C}$  NMR spectra of bio-based epoxy resin and its intermediates

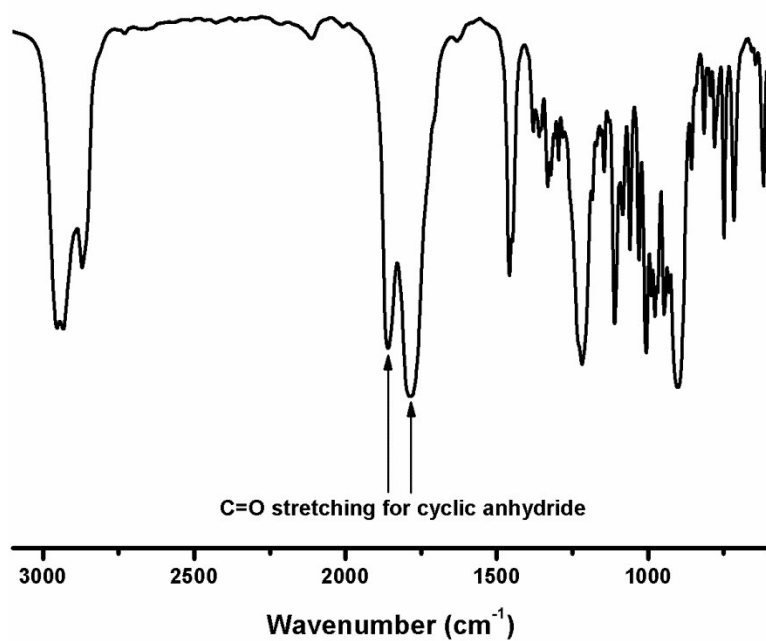

**Figure S3.** FT-IR spectrum of 4-methyl hexahydrophthalic anhydride
